# Supplementary material for: Da-Chuan-Xiong Decoction Ameliorates Sodium Sensitivity and Plasma Norepinephrine via Attenuation of Brain Oxidative Stress in the DOCA-Salt Hypertensive Rats
Source: Hindawi journal article supplement (doi:10.1155/2024/2226143), 2024-02-02

**Legend for Figure S1. Components analysis of DCXD by UPLC-Q/TOF-MS. (A) Total ion current chromatogram under negative ion mode. (B) Total ion current chromatogram under positive ion mode. (C) UPLC UV chromatogram of DCXD sample (UV 280 nm).**

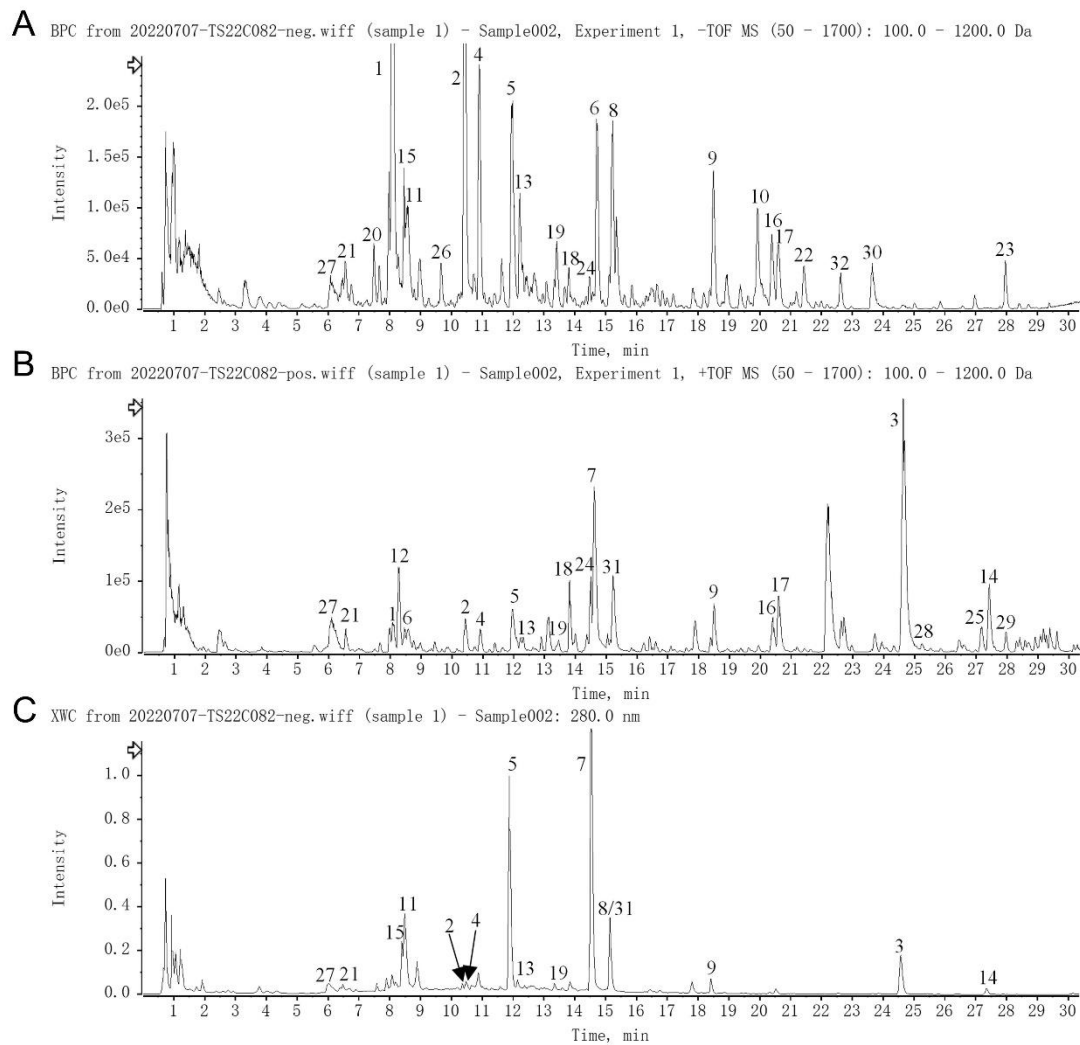

Supplement: f1 [file 2226143.f1.zip]
