# Supplementary material for: Da-Chuan-Xiong Decoction Ameliorates Sodium Sensitivity and Plasma Norepinephrine via Attenuation of Brain Oxidative Stress in the DOCA-Salt Hypertensive Rats
Source: Hindawi journal article supplement (doi:10.1155/2024/2226143), 2024-02-02
Supplement: f1 [file 2226143.f1.zip]

1 **Table S1.** Identification Results of Main Components of DCXD Samples

| Nu<br>m. | T(min<br>) | adduct<br>ions            | <i>m/z</i> real<br>value | <i>m/z</i><br>theoretic<br>al value | ppm | MF                                                                 | mol wt | Name                                            | DC | assignment |
|----------|------------|---------------------------|--------------------------|-------------------------------------|-----|--------------------------------------------------------------------|--------|-------------------------------------------------|----|------------|
| 1        | 8.09       | [M-H] <sup>-</sup>        | 459.1175                 | 459.1144                            | 6.7 | C <sub>19</sub> H <sub>24</sub> O <sub>13</sub>                    | 460.12 | Parishin E                                      | √  | Tianma     |
| 2        | 10.43      | [M-H] <sup>-</sup>        | 727.2150                 | 727.2091                            | 8.1 | C <sub>32</sub> H <sub>40</sub> O <sub>19</sub>                    | 728.22 | Parishin B                                      | √  | Tianma     |
| 3        | 24.65      | [M+H] <sup>+</sup>        | 193.1232                 | 193.1223                            | 4.6 | C <sub>12</sub> H <sub>16</sub> O <sub>2</sub>                     | 192.12 | Senkyunoli<br>de A                              | √  | Chuanxiong |
| 4        | 10.91      | [M-H] <sup>-</sup>        | 727.2133                 | 727.2091                            | 5.8 | C <sub>32</sub> H <sub>40</sub> O <sub>19</sub>                    | 728.22 | Parishin C                                      | √  | Tianma     |
| 5        | 11.97      | [M-H] <sup>-</sup>        | 193.0517                 | 193.0506                            | 5.5 | C <sub>10</sub> H <sub>10</sub> O <sub>4</sub>                     | 194.06 | Ferulic acid                                    | √  | Chuanxiong |
| 6        | 14.72      | [M+FA-<br>H] <sup>-</sup> | 549.2224                 | 549.2189                            | 6.4 | C <sub>23</sub> H <sub>36</sub> O <sub>12</sub>                    | 504.22 | Chuanxion<br>goside B                           |    | Chuanxiong |
| 7        | 14.62      | [M+H] <sup>+</sup>        | 225.1127                 | 225.1121                            | 2.5 | C <sub>12</sub> H <sub>16</sub> O <sub>4</sub>                     | 224.10 | Senkyunoli<br>de I                              | √  | Chuanxiong |
| 8        | 15.22      | [M-H] <sup>-</sup>        | 237.0781                 | 237.0768                            | 5.3 | C <sub>12</sub> H <sub>14</sub> O <sub>5</sub>                     | 238.08 | Trimethoxy<br>cinnamic<br>acid                  |    | Chuanxiong |
| 9        | 18.50      | [M-H] <sup>-</sup>        | 577.1398                 | 577.1352                            | 8.1 | C <sub>30</sub> H <sub>26</sub> O <sub>12</sub>                    | 578.14 | 4-O-8',5'-<br>5"-<br>dehydrotrif<br>erulic acid |    |            |
| 10       | 19.30      | [M-H] <sup>-</sup>        | 329.2346                 | 329.2333                            | 3.8 | C <sub>18</sub> H <sub>34</sub> O <sub>5</sub>                     | 330.24 | Trihydroxy<br>octadeceno<br>ic acid             |    | Chuanxiong |
| 11       | 8.58       | [M-H] <sup>-</sup>        | 167.0363                 | 167.0350                            | 7.8 | C <sub>8</sub> H <sub>8</sub> O <sub>4</sub>                       | 168.15 | Griffonilide                                    | √  |            |
| 12       | 8.28       | [M+H] <sup>+</sup>        | 414.1345                 | 414.1329                            | 3.7 | C <sub>17</sub> H <sub>23</sub> N <sub>3</sub> O <sub>7</sub><br>S | 413.13 | S-(4-<br>hydroxyben<br>zyl)<br>giutathione      |    | Tianma     |
| 13       | 12.22      | [M+FA-<br>H] <sup>-</sup> | 1041.3167                | 1041.3093                           | 7.1 | C <sub>45</sub> H <sub>56</sub> O <sub>25</sub>                    | 996.31 | Parishin A                                      | √  | Tianma     |
| 14       | 27.42      | [M+H] <sup>+</sup>        | 191.1081                 | 191.1067                            | 7.6 | C <sub>12</sub> H <sub>14</sub> O <sub>2</sub>                     | 190.10 | Ligustilide                                     | √  | Chuanxiong |
| 15       | 8.47       | [M-H] <sup>-</sup>        | 353.0889                 | 353.0878                            | 3.1 | C <sub>16</sub> H <sub>18</sub> O <sub>9</sub>                     | 354.10 | Chlorogeni<br>c acid                            | √  | Chuanxiong |

|    |       |                    |          |          |      |                                                               |        |                                                                                                                                            |   |                     |
|----|-------|--------------------|----------|----------|------|---------------------------------------------------------------|--------|--------------------------------------------------------------------------------------------------------------------------------------------|---|---------------------|
| 16 | 20.41 | [M-H] <sup>-</sup> | 205.0882 | 205.0870 | 5.8  | C <sub>12</sub> H <sub>14</sub> O <sub>3</sub>                | 206.09 | (Z)-6,7-epoxyligustilide                                                                                                                   |   | Chuanxiong          |
| 17 | 20.60 | [M-H] <sup>-</sup> | 207.1040 | 207.1027 | 6.4  | C <sub>12</sub> H <sub>16</sub> O <sub>3</sub>                | 208.11 | Senkyunolide G                                                                                                                             |   | Chuanxiong          |
| 18 | 13.82 | [M+H] <sup>+</sup> | 679.5127 | 679.5117 | 1.5  | C <sub>36</sub> H <sub>66</sub> N <sub>6</sub> O <sub>6</sub> | 678.50 | Cyclohexa(iso)leucyl                                                                                                                       |   | Tianma /Chuanxiong  |
| 19 | 13.42 | [M-H] <sup>-</sup> | 515.1232 | 515.1195 | 7.2  | C <sub>25</sub> H <sub>24</sub> O <sub>12</sub>               | 516.13 | Isochlorogenic acid C                                                                                                                      | √ | Chuanxiong          |
| 20 | 7.49  | [M-H] <sup>-</sup> | 459.1180 | 459.1144 | 7.8  | C <sub>19</sub> H <sub>24</sub> O <sub>13</sub>               | 460.12 | Parishin G                                                                                                                                 |   | Tianma              |
| 21 | 6.56  | [M-H] <sup>-</sup> | 515.1435 | 515.1406 | 9.0  | C <sub>22</sub> H <sub>28</sub> O <sub>14</sub>               | 516.15 | Dicaffeoylquinic acid                                                                                                                      |   | Chuanxiong          |
| 22 | 21.44 | [M-H] <sup>-</sup> | 205.0879 | 205.0870 | 4.3  | C <sub>12</sub> H <sub>14</sub> O <sub>3</sub>                | 206.09 | (E)-6,7-epoxyligustilide                                                                                                                   |   | Chuanxiong          |
| 23 | 27.97 | [M-H] <sup>-</sup> | 397.2039 | 397.2020 | 4.7  | C <sub>24</sub> H <sub>30</sub> O <sub>5</sub>                | 398.21 | 6,9-Ethanonaphtho[1,2-c]furan-8-carboxylic acid, 3-butylidene-1,3,4,5,5a,6,9,9a-octahydro-1-oxo-9-(1-oxopentyl)-, (3Z,5aS,6S,9S,9aS)-(ACI) |   | Chuanxiong          |
| 24 | 14.50 | [M+H] <sup>+</sup> | 792.5953 | 792.5957 | -0.5 | C <sub>42</sub> H <sub>77</sub> N <sub>7</sub> O <sub>7</sub> | 791.59 | Cyclohexa(iso)leucyl                                                                                                                       |   | Tianma / Chuanxiong |
| 25 | 27.17 | [M+H] <sup>+</sup> | 195.1385 | 195.1380 | 2.8  | C <sub>12</sub> H <sub>18</sub> O <sub>2</sub>                | 194.13 | Neocnidilide                                                                                                                               | √ | Chuanxiong          |
| 26 | 9.67  | [M-H] <sup>-</sup> | 401.1464 | 401.1453 | 2.7  | C <sub>18</sub> H <sub>26</sub> O <sub>10</sub>               | 402.15 | Icariside F2                                                                                                                               |   | Chuanxiong          |
| 27 | 6.11  | [M+H] <sup>+</sup> | 205.0976 | 205.0972 | 2.2  | C <sub>11</sub> H <sub>12</sub> N <sub>2</sub> O <sub>2</sub> | 204.09 | Tryptophan                                                                                                                                 | √ | Tianma / Chuanxiong |
| 28 | 25.25 | [M+H] <sup>+</sup> | 191.1075 | 191.1067 | 4.4  | C <sub>12</sub> H <sub>14</sub> O <sub>2</sub>                | 190.10 | 3-Butylphthalide                                                                                                                           | √ | Chuanxiong          |
| 29 | 27.96 | [M+H] <sup>+</sup> | 191.1075 | 191.1067 | 4.4  | C <sub>12</sub> H <sub>14</sub> O <sub>2</sub>                | 190.10 | Ligustilide                                                                                                                                |   | Chuanxiong          |

|    |       |                     |          |          |     |                                                |        |                    |   |            |
|----|-------|---------------------|----------|----------|-----|------------------------------------------------|--------|--------------------|---|------------|
| 30 | 23.71 | [M-H] <sup>-</sup>  | 277.1454 | 277.1445 | 3.1 | C <sub>16</sub> H <sub>22</sub> O <sub>4</sub> | 278.15 | Senkyunoli<br>de M |   | Chuanxiong |
| 31 | 15.22 | [M+Na] <sup>+</sup> | 247.0953 | 247.0941 | 4.9 | C <sub>12</sub> H <sub>16</sub> O <sub>4</sub> | 224.10 | Senkyunoli<br>de H | √ | Chuanxiong |
| 32 | 22.63 | [M-H] <sup>-</sup>  | 277.1453 | 277.1445 | 2.8 | C <sub>16</sub> H <sub>22</sub> O <sub>4</sub> | 278.15 | Senkyunoli<br>de Q |   | Chuanxiong |

---

2 **Abbreviations:** MF, molecular formula. mol wt, molecular weight. DC, database comparison.

3
